# Supplementary material
Source: publisher figshare collection journal article supplement (https://gsapubs.figshare.com/ndownloader/files/23317721)
Supplement: Supplementary file 1 [file 23317721]

## Sheet: Sup Mat 3
36Cl output
Sample Name	Unit	Material	Age	± 1σ	Erosion Rate	Scaling Ca Spallation	Scaling K Spallation	Scaling Fe Spallation	Scaling Ti Spallation	Scaling Cl Epithermal	Scaling Cl Thermal	Scaling Fast Muons	Scaling Slow Muons	Production Ca Spallation	Production K Spallation	Production Fe Spallation	Production Ti Spallation	Production Ca Muons	Production K Muons	Production Cl Low Energy	Sigma th	Sigma eth	Sigma sc	Qs	Qth	Qeth	Qmu	Cosmogenic Cl	Radiogenic Cl	Analytical (Internal) Uncertainty	Percent Ca	Percent K	Percent Cl
R15DS107	bsof	Plagioclase	21.4	2.3	0.268	1.3691	1.3691	1.3691	1.3691	1.3691	1.3691	1.0895	1.0895	6.07	0.35445	0.0077681	0.0036629	0.25563	0.014836	0.041702	0.0090478	0.020981	0.10751	1.0308	1.0712	1.046	0.99903	138616	17.1878	1.1306	93.74	5.472	0.618
R14TS019	bnof	Whole-rock	22	3.3	0.233	1.3856	1.3856	1.3856	1.3856	1.3856	1.3856	1.0977	1.0977	4.411	1.3396	0.25221	0.15303	0.18712	0.056463	5.8311	0.0088828	0.02185	0.1087	0.97794	1.2278	1.1259	0.99663	269999	5933.06	1.6009	37.6	11.41	47.68
R15MS014	bsof	Whole-rock	26	3	0.233	1.4623	1.4623	1.4623	1.4623	1.4623	1.4623	1.1339	1.1339	5.6998	0.98615	0.23762	0.12484	0.23802	0.041052	2.5916	0.0087585	0.020465	0.10614	0.98476	1.2466	1.1412	0.99485	254194	1551.13	1.6748	59.86	10.36	26.13
R14TS009a	bsof	Whole-rock	26.4	2.9	0.236	1.4682	1.4682	1.4682	1.4682	1.4682	1.4682	1.1367	1.1367	5.6342	0.6917	0.24488	0.10221	0.23386	0.028616	2.4065	0.0090529	0.021686	0.10816	0.99139	1.2305	1.1269	0.99532	241830	816.806	1.5411	62.81	7.711	25.76
R15MS030	bcef	Whole-rock	29.1	3.7	0.187	1.3716	1.3716	1.3716	1.3716	1.3716	1.3716	1.0911	1.0911	4.745	1.2166	0.21965	0.1507	0.20394	0.05207	3.7972	0.009277	0.025685	0.11038	0.98612	1.1959	1.0943	0.9974	299268	3948.76	1.7879	47.65	12.22	36.56
R17AC138	trg	Whole-rock	9	2.5	0.1225	1.8538	1.8538	1.8538	1.8538	1.8538	1.8538	1.3121	1.3121	0.87327	11.2072	0.13598	0.010809	0.033579	0.43569	42.6656	0.0087707	0.036391	0.11923	0.9749	1.2794	1.0699	0.99181	501942	220843	1.7434	1.638	21.03	77.07
36Cl input parameters															Oxide concentrations reported in wt.%
Sample Name	Latitude	Longitude	Elevation	Pressure	Sample Thickness (cm)	Bulk Density (g/cm3)	Shielding Factor	Erosion Rate (mm/kyr)	Conc. 36Cl (atoms/gram)	Attenuation length	Depth to Top of Sample	Year Collected	Water Content in Pores (wt.%)	Mineral Separation	Bulk-Rock SiO2 (wt.%)	Bulk-Rock TiO2 (wt.%)	Bulk-Rock Al2O3 (wt.%)	Bulk-Rock Fe2O3 (wt.%)	Bulk-Rock MnO (wt.%)	Bulk-Rock MgO (wt.%)	Bulk-Rock CaO (wt.%)	Bulk-Rock Na2O (wt.%)	Bulk-Rock K2O (wt.%)	Bulk-Rock P2O5 (wt.%)	Analytical Water (wt.%)	Bulk-Rock CO2 (wt.%)	Bulk-Rock Cl (ppm)	Bulk-Rock B (ppm)	Bulk-Rock Sm (ppm)	Bulk-Rock Gd (ppm)	Bulk-Rock U (ppm)	Bulk-Rock Th (ppm)	Bulk-Rock Cr (ppm)	Bulk-Rock Li (ppm)	Target K2O (wt.%)	Target CaO (wt.%)	Target TiO2 (wt.%)	Target Fe2O3 (wt.%)	Target Cl (ppm)	Latitude Uncertainty	Longitude Uncertainty	Elevation Uncertainty (m)	Pressure Uncertainty	Sample Thickness Uncertainty (cm)	Bulk Density Uncertainty (g/cm3)	Shielding Factor Uncertainty	Erosion-Rate Uncertainty (mm/kyr)	Conc. 36Cl Uncertainty (atoms/gram)	Attenuation Length Uncertainty
R14TS9a	24.3003	39.8799	919.6	N/A	4	2.36	1	1	242647	165	0	2015	0.01	No	45.6	2.39	16.2	13.2	0.18	8.88	10.6	2.8	0.39	0.2	0.41667	0.2	57.1	5	3.2	3.69	0.17	0.4	309	5	NaN	NaN	NaN	NaN	NaN	1e-05	1e-05	0.5	NaN	0.5	0.000838036	0.01	1	13367	10
R14TS19	24.387	39.8494	834.9	N/A	4	2.33	1	1	275932	165	0	2015	0.01	No	45.5	3.79	16.7	14.4	0.18	6.58	8.79	3.62	0.8	0.35	0.41663	0.2	147.6	5	4.8	4.92	0.41	1.3	68	5	NaN	NaN	NaN	NaN	NaN	1e-05	1e-05	0.5	NaN	0.5	0.000660982	0.01	1	17972	10
R15MS014	24.3062	39.886	913.8	N/A	4.5	2.33	1	1	255745	165	0	2015	0.01	No	46.2	2.94	17.2	12.9	0.17	6.23	10.8	3.06	0.56	0.22	0.32693	0.2	60	5	4.2	4.57	0.28	0.8	187	5	NaN	NaN	NaN	NaN	NaN	1e-05	1e-05	0.5	NaN	0.5	0.000119797	0.01	1	15505.4	10
R15MS030	24.4062	39.8816	820.1	N/A	4	1.87	1	1	303217	165	0	2015	0.01	No	47	3.75	17.4	12.6	0.14	4.68	9.5	3.36	0.73	0.29	0.596	0.2	101	5	5	5.3	0.48	1.2	184	5	NaN	NaN	NaN	NaN	NaN	1e-05	1e-05	0.5	NaN	0.5	8.06491e-05	0.01	1	16732.6	10
R15DS107	24.3266	39.9561	820.3	N/A	1	2.68	1	1	138633	165	0	2015	0.01	Yes	45.6	2.39	16.2	13.2	0.18	8.88	10.6	2.8	0.39	0.2	0.41667	0.2	57.1	5	3.2	3.69	0.17	0.4	309	5	0.21	12	0.09	0.44	1.2	1e-05	1e-05	0.5	NaN	0.5	0.001	0.01	1	6484.56	10
R17AC138	24.0904	39.9601	1261	N/A	4	2.44701	1	0.5	722785	165	0	2017	0.01	No	62.9052	0.212723	17.3217	5.79417	0.192464	0.182334	1.32699	6.97934	5.01418	0.0506483	1.47	0.2	792.057	15	11.7	11.3	2.54	7.6	5	29	NaN	NaN	NaN	NaN	NaN	1e-05	1e-05	2.5	NaN	0.5	0.005	0.01	0.5	95904.6	10
Suplemental Material 3: Input parameters and full output for 36Cl exposure age calculations using the online CRONUScalc 36Cl Exposure Age Calculator v2.0 (Marrero et al. 2016). Ages were calculated using the Lal/Stone time independent scaling model (Lal 1991; Stone 2000). See Supplemental Material 1 for details on analytical methods, sample characteristics, and data reduction methods. Easting and…
Journal Title: Geological Society of America Bulletin
Manuscript Title: The timing and compositional evolution of volcanism within northern Harrat Rahat, Kingdom of Saudi Arabia
Authors: Mark E. Stelten , Drew T. Downs, Duane E. Champion, Hannah R. Dietterich, Andrew T. Calvert, Thomas W. Sisson, Gail A. Mahood, and Hani Zahran
Corresponding author: Mark E. Stelten , United States Geological Survey, Menlo Park, CA
Corresponding author e-mail: mstelten@usgs.gov
[truncated: 29 more columns]
